# Supplementary material
Source: PubMed Central journal article supplement (PMC55485)

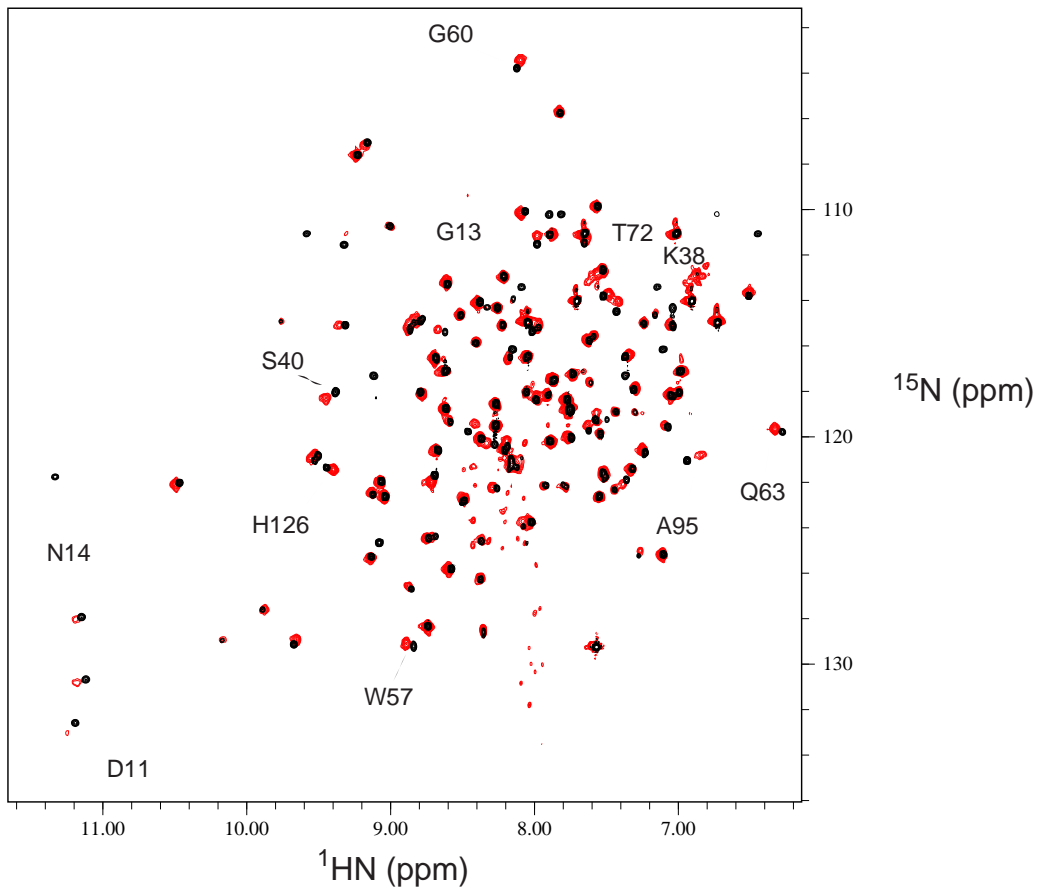

Supplement: pnas_171168898_2.pdf [file pnas_171168898_2.pdf]

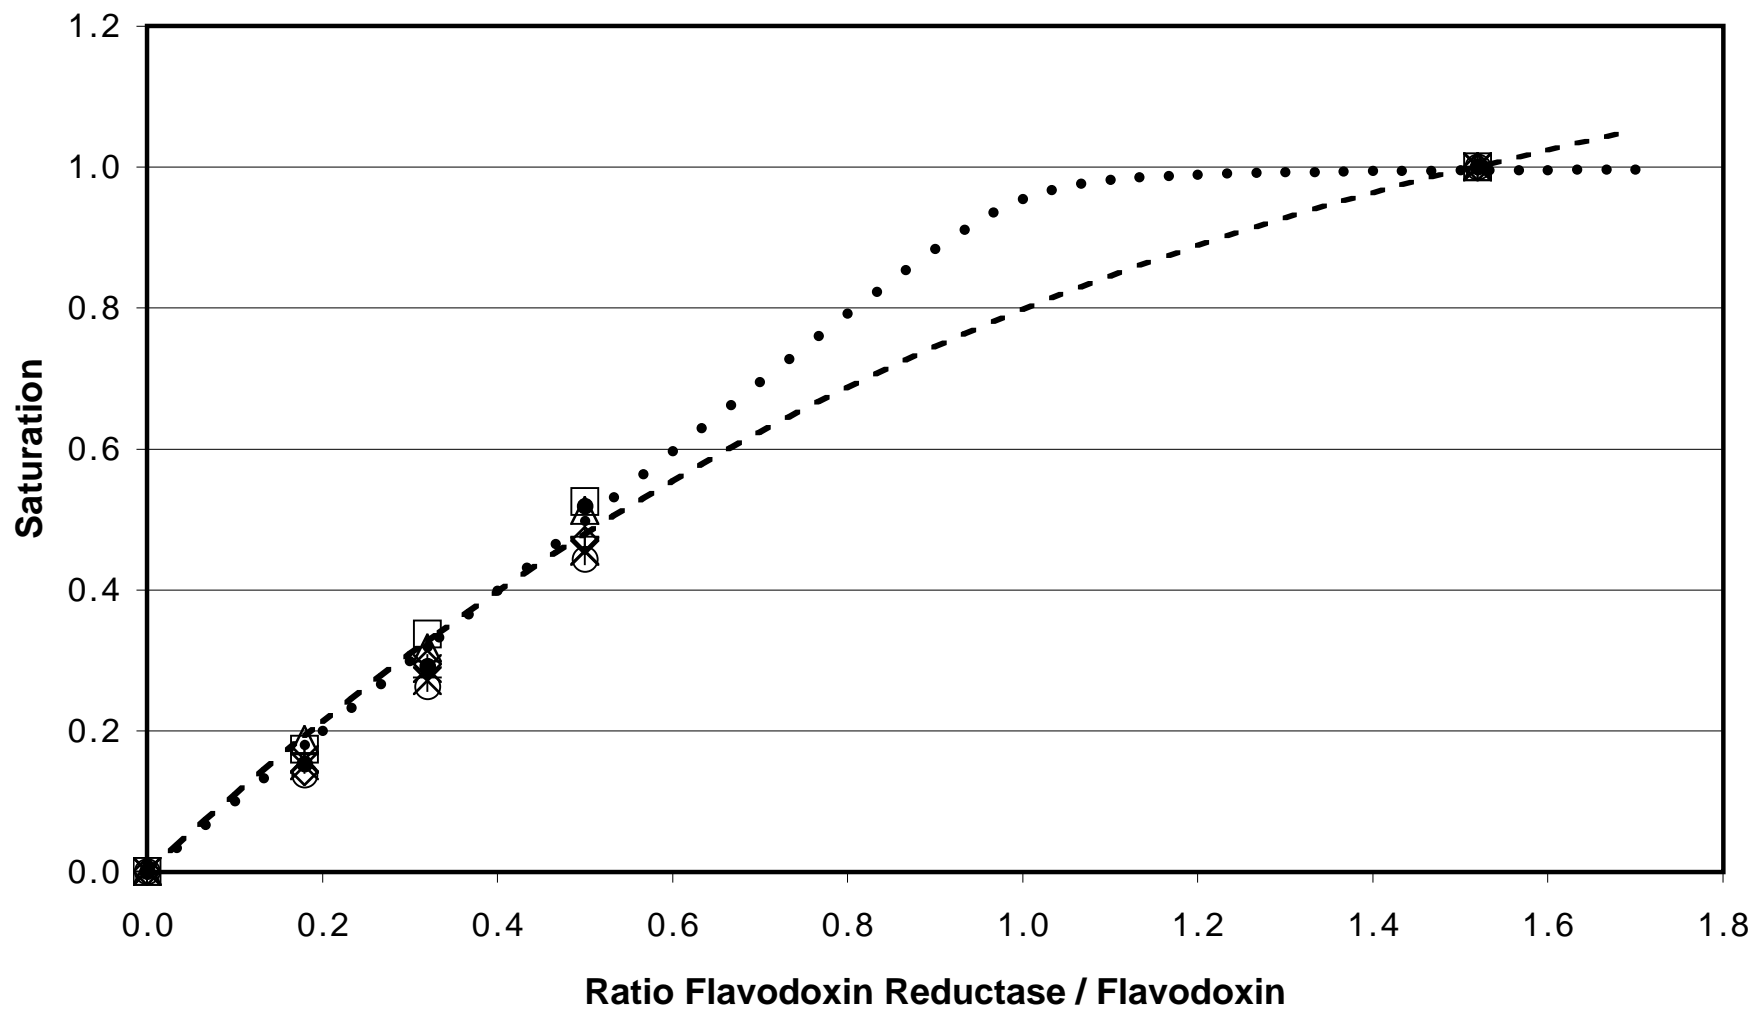

Supplement: pnas_171168898_4.pdf [file pnas_171168898_4.pdf]

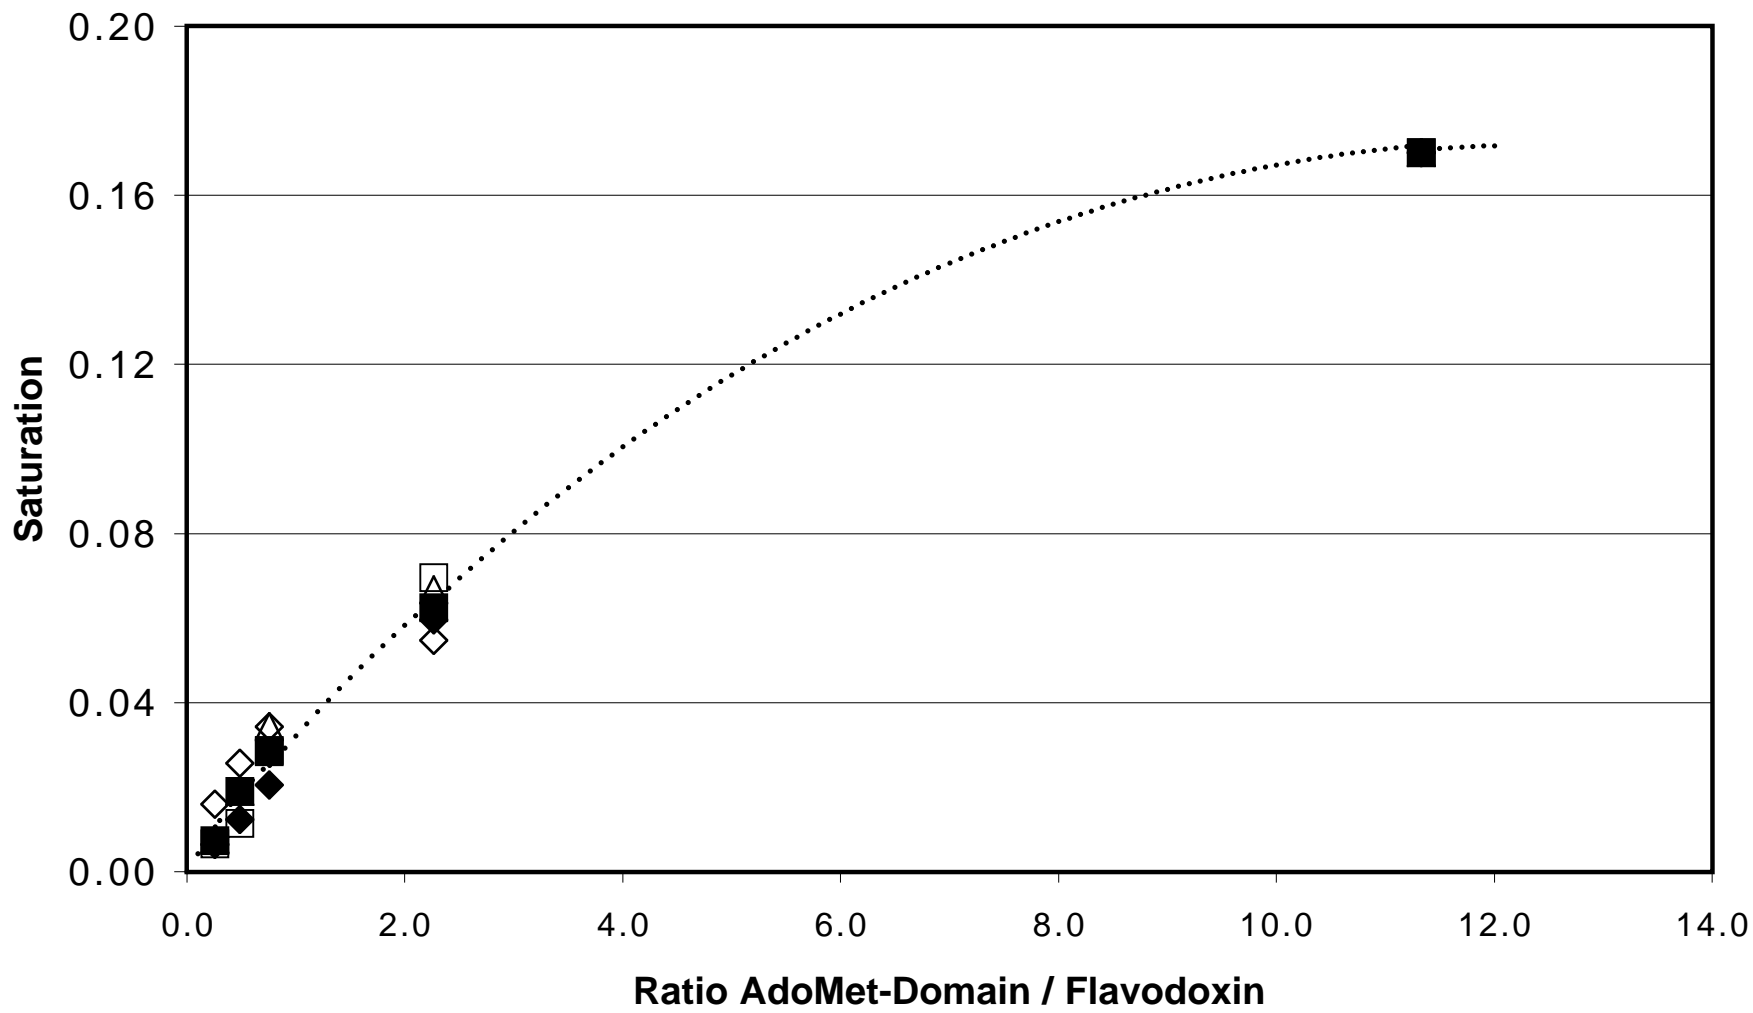

Supplement: pnas_171168898_6.pdf [file pnas_171168898_6.pdf]
